# Supplementary material for: Novel POSS-based organic–inorganic hybrid porous materials by low cost strategies
Source: Royal Society of Chemistry journal article supplement (doi:10.1039/c4ta06963c), 2015-01-01
Supplement: c4ta06963c1.pdf [file c4ta06963c1.pdf]

## Novel POSS-based Organic-Inorganic Hybrid Porous Materials by Low Cost Strategy

Shaolei Wang,<sup>a</sup> Liangxiao Tan,<sup>a</sup> Chengxin Zhang,<sup>a</sup> Irshad Hussain,<sup>c</sup> and Bien Tan<sup>\*a,b</sup>

### Supporting Information

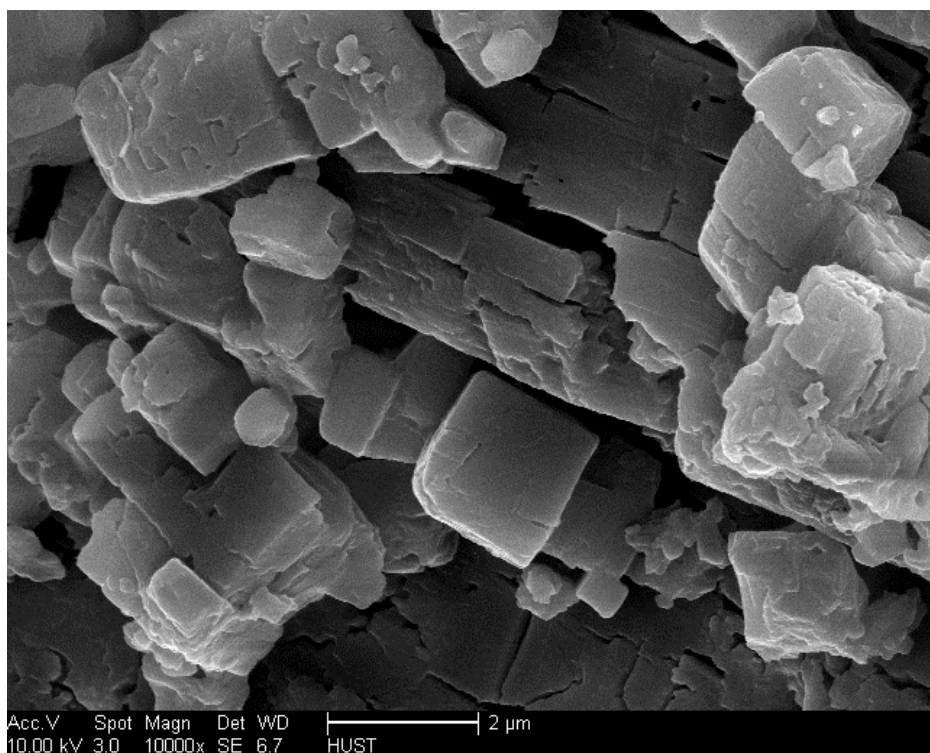

(a)

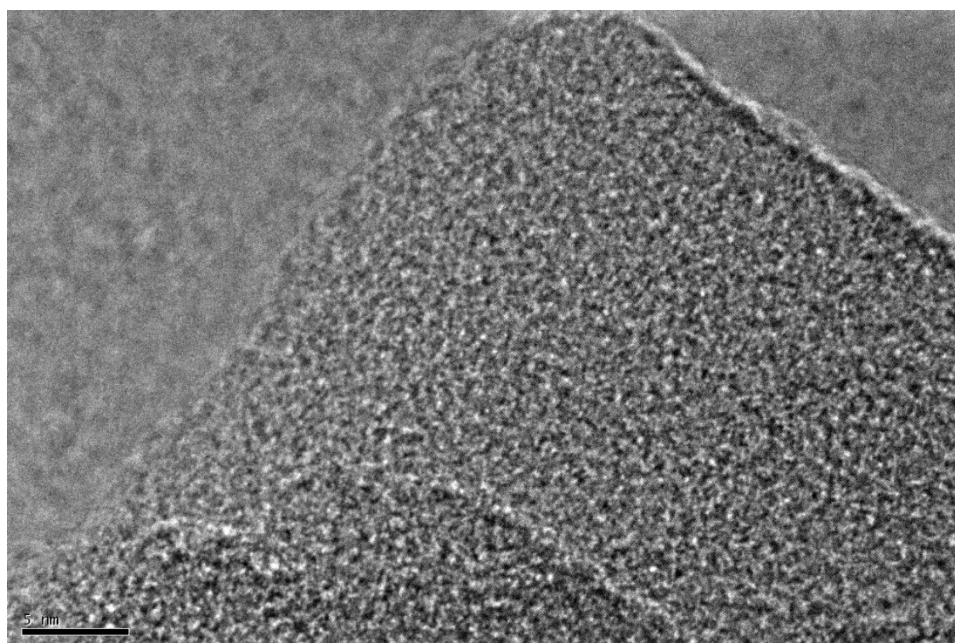

Figure S1 SEM image (a) and HRTEM image (b) of OPS.

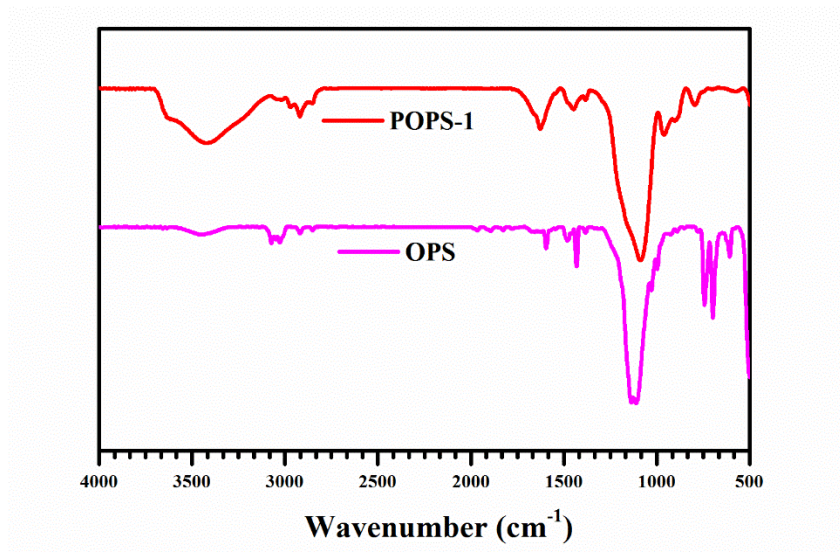

Figure S2 Fourier transform infrared (FTIR) spectra of OPS and POPS-1.

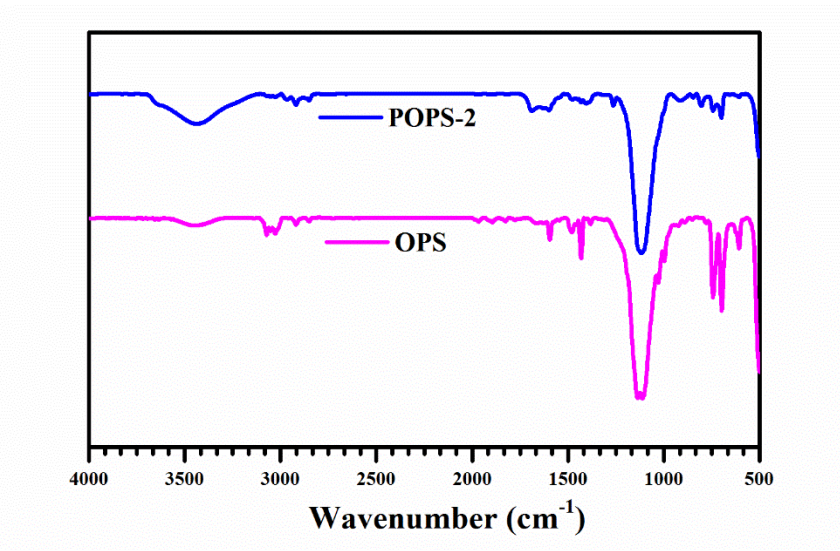

Figure S3 Fourier transform infrared (FTIR) spectra of OPS and POPS-2.

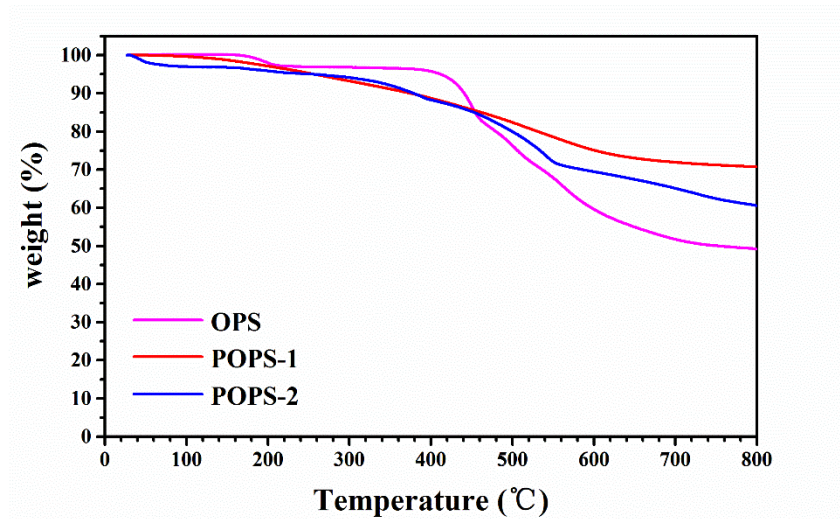

Figure S4 Thermogravimetric analysis of OPS, POPS-1 and POPS-2.

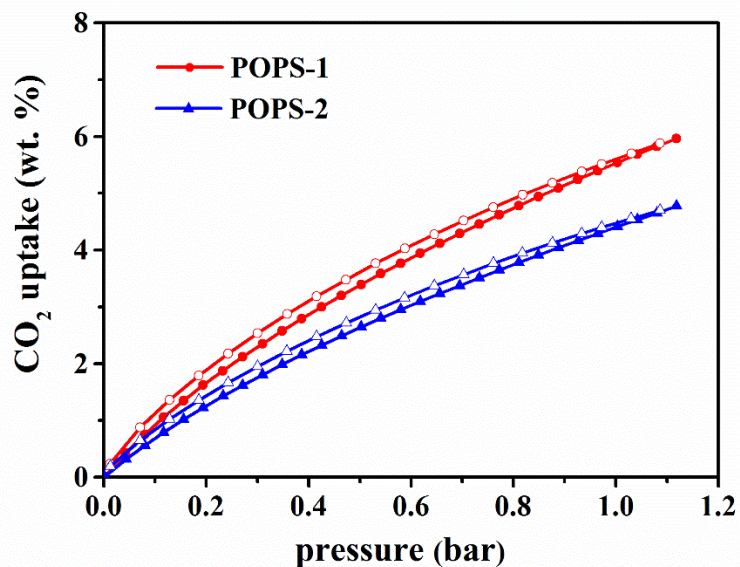

Figure S5 Volumetric CO<sub>2</sub> sorption isotherms of samples up to 1.13 bar at 298.15 K.

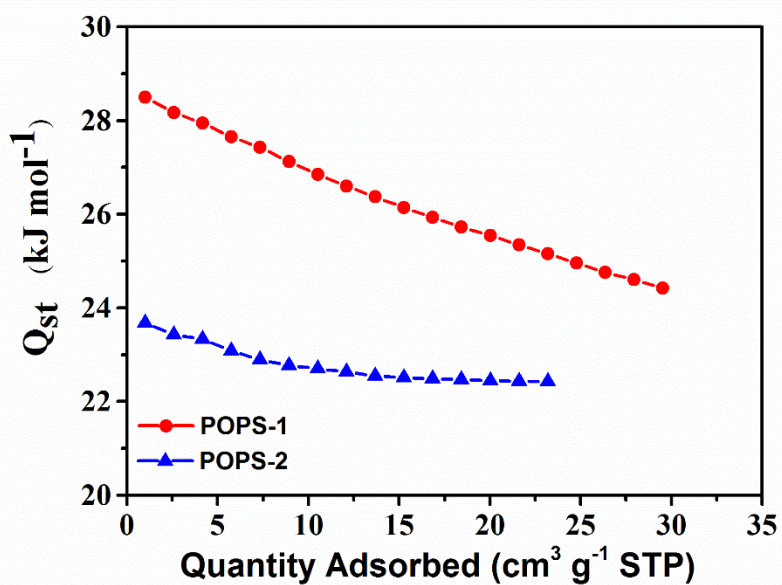

Figure S6 Isothermic heat of adsorption for CO<sub>2</sub> at different CO<sub>2</sub> loadings.

$$\text{Yield \%} = \frac{m_1(\text{g})}{m_2(\text{g})} \times 100\%$$

Where  $m_1$  is the weight of POPS-1 or POPS-2 measured after drying in a vacuum oven at 60 °C for 24 h.;  $m_2$  is the weight of Octapheylsilsesquioxanes.

Equation S1 The yield estimation of POPS-1 and POPS-2
